# Supplementary material for: Improving the electrochemical performance of Li2S cathodes based on point defect control with cation/anion dual doping
Source: Royal Society of Chemistry journal article supplement (doi:10.1039/d3ta05426h), 2023-01-01
Supplement: d3ta05426h1.pdf [file d3ta05426h1.pdf]

## **Improving electrochemical performance of Li<sub>2</sub>S cathode based on point defect control with cation/anion dual doping**

*Wenli Pan,<sup>a</sup> Kentaro Yamamoto,<sup>\*a,b</sup> Nobuya Machida,<sup>c</sup> Toshiyuki Matsunaga,<sup>a</sup> Mukesh Kumar,<sup>a</sup> Neha Thakur,<sup>a</sup> Toshiki Watanabe,<sup>a</sup> Atsushi Sakuda,<sup>d</sup> Akitoshi Hayashi,<sup>d</sup> Masahiro Tatsumisago<sup>d</sup> and Yoshiharu Uchimoto<sup>a</sup>*

<sup>a</sup> *Graduate School of Human and Environmental Studies, Kyoto University, Yoshida Nihonmatsucho, Sakyo, Kyoto 606-8501, Japan.*

<sup>b</sup> *Faculty of Engineering, Nara Women's University, Kitauoya-nishimachi, Nara, 630-8263, Japan*

<sup>c</sup> *Department of Chemistry of Functional Molecules, Konan University, Hyogo 658-8501, Japan.*

<sup>d</sup> *Department of Applied Chemistry, Graduate School of Engineering, Osaka Metropolitan University, Sakai, Osaka 599-8531, Japan*

*\*E-mail: Dr. K. Yamamoto ([k.yamamoto@cc.nara-wu.ac.jp](mailto:k.yamamoto@cc.nara-wu.ac.jp));*

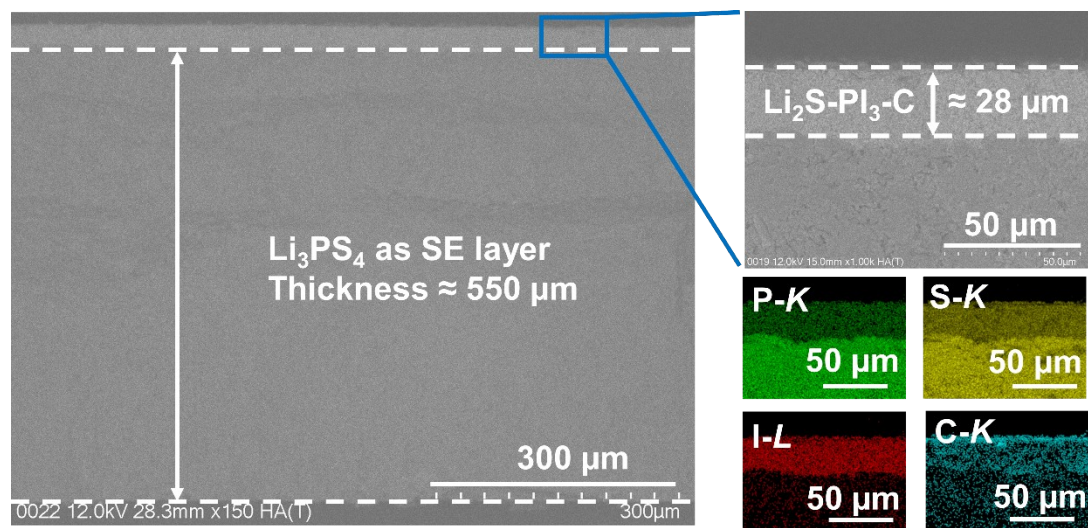

**Fig. S1** The cross-section SEM with EDS mapping of  $\text{Li}_2\text{S-PI}_3\text{-C/Li}_3\text{PS}_4$  pellet.

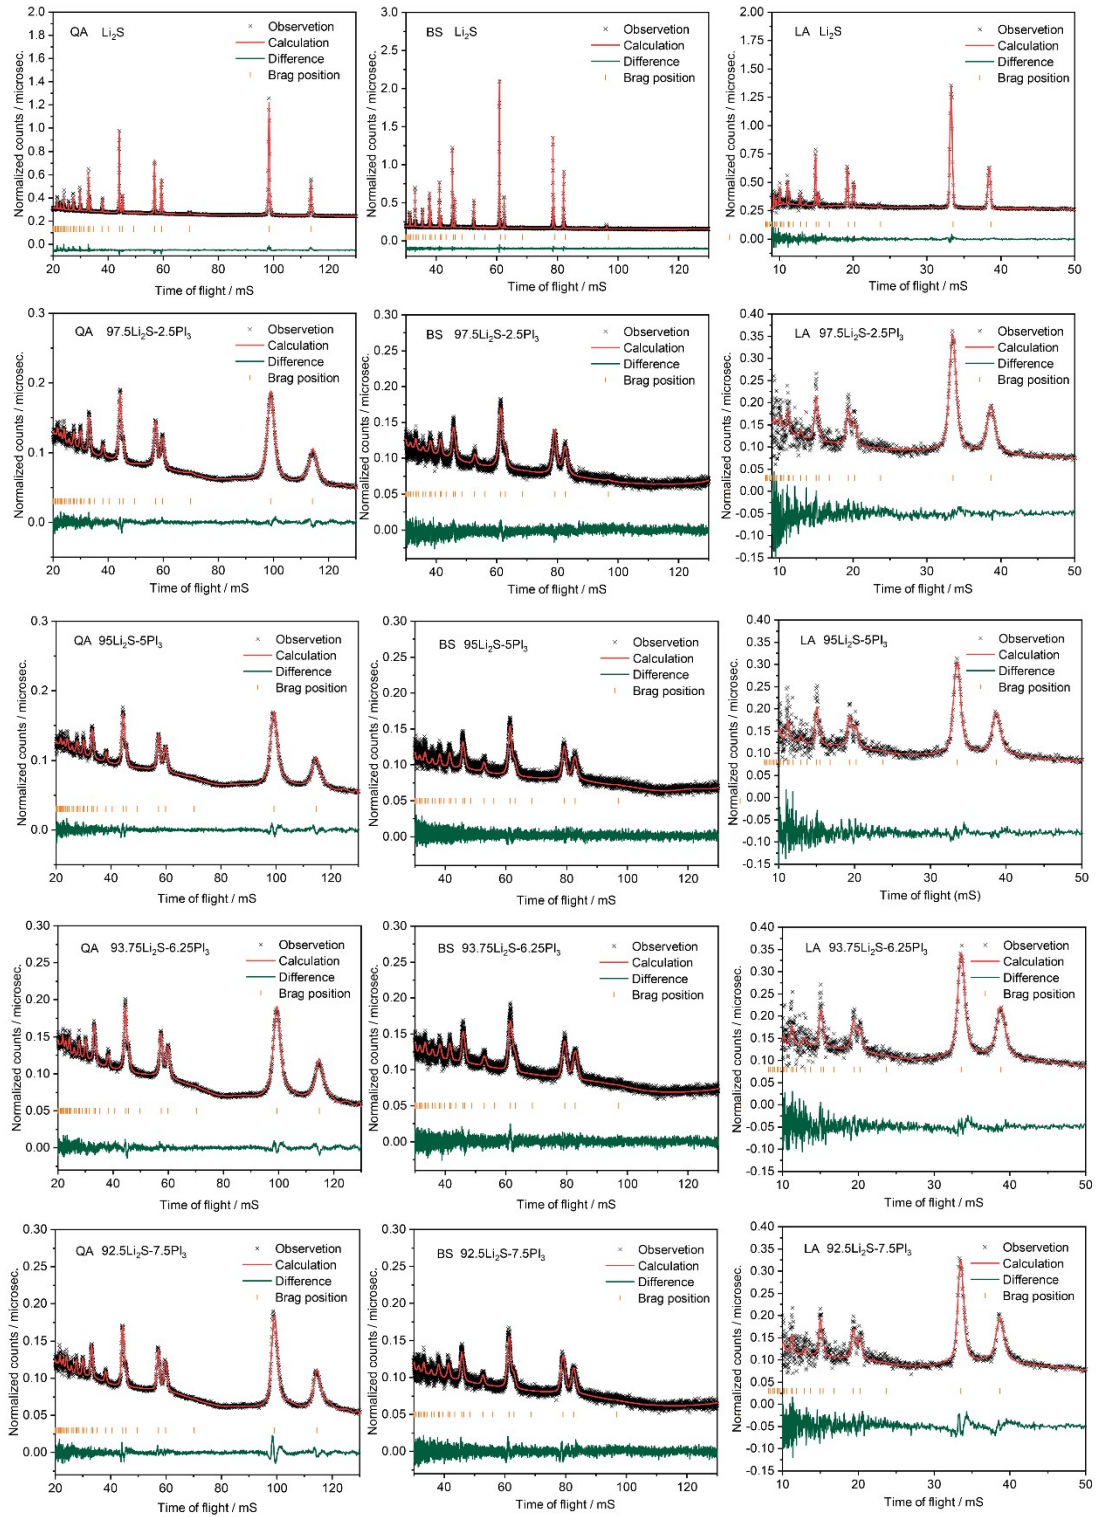

**Fig. S2** Rietveld refinement results performed with TOF neutron diffraction data using all of QA, BS and LA detectors to determine the structural parameters more precisely for  $\text{Li}_2\text{S}$ ,  $97.5\text{Li}_2\text{S}-2.5\text{PI}_3$ ,  $95\text{Li}_2\text{S}-5\text{PI}_3$ ,  $93.75\text{Li}_2\text{S}-6.25\text{PI}_3$ ,  $92.5\text{Li}_2\text{S}-7.5\text{PI}_3$ .

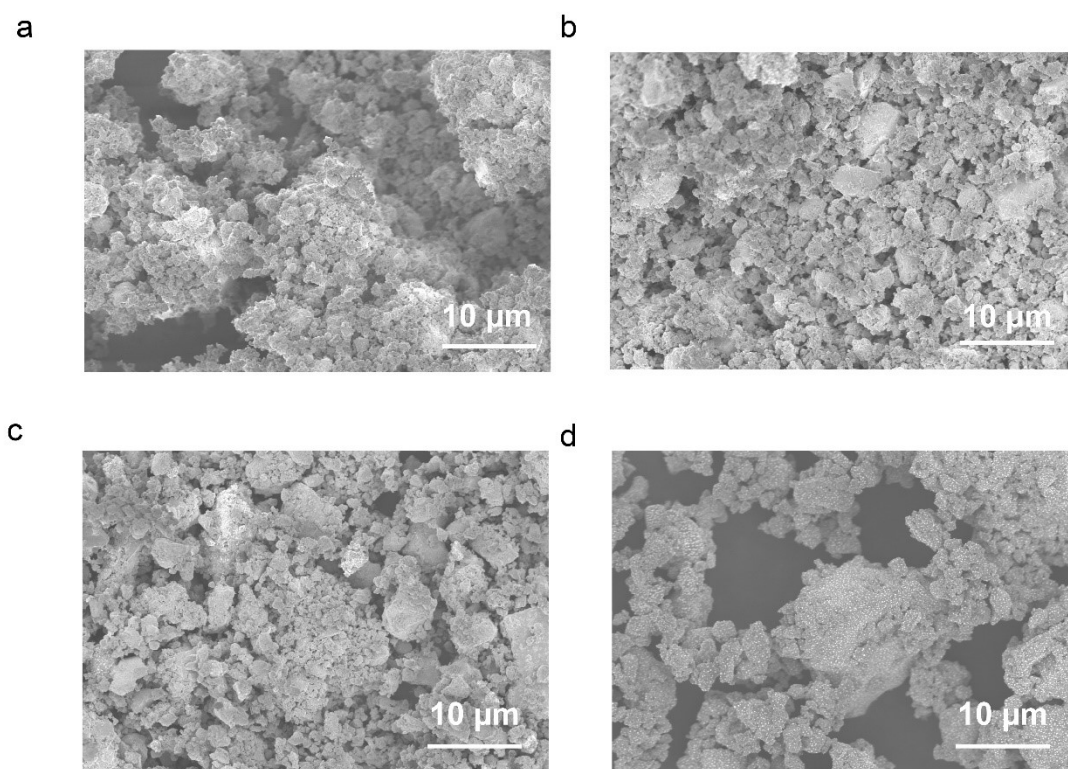

**Fig. S3** SEM images of (a)  $97.5\text{Li}_2\text{S}-2.5\text{PI}_3$  (b)  $95\text{Li}_2\text{S}-5\text{PI}_3$  (c)  $93.75\text{Li}_2\text{S}-6.25\text{PI}_3$  (d)  $92.5\text{Li}_2\text{S}-7.5\text{PI}_3$ .

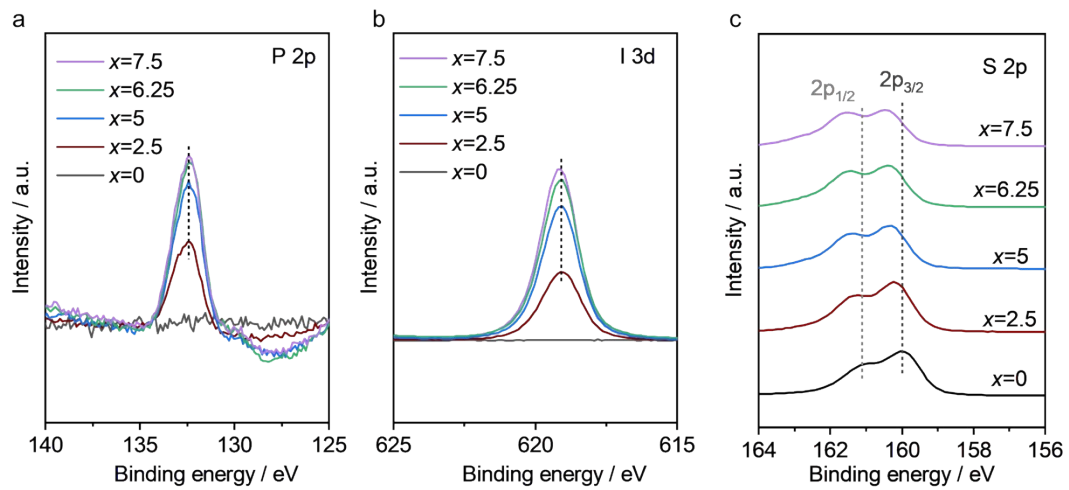

**Fig. S4** XPS P 2p, I 3d and S 2p for  $(100-x) \text{Li}_2\text{S}-x \text{PI}_3$  ( $x=0, 2.5, 5, 6.25, 7.5$ ).

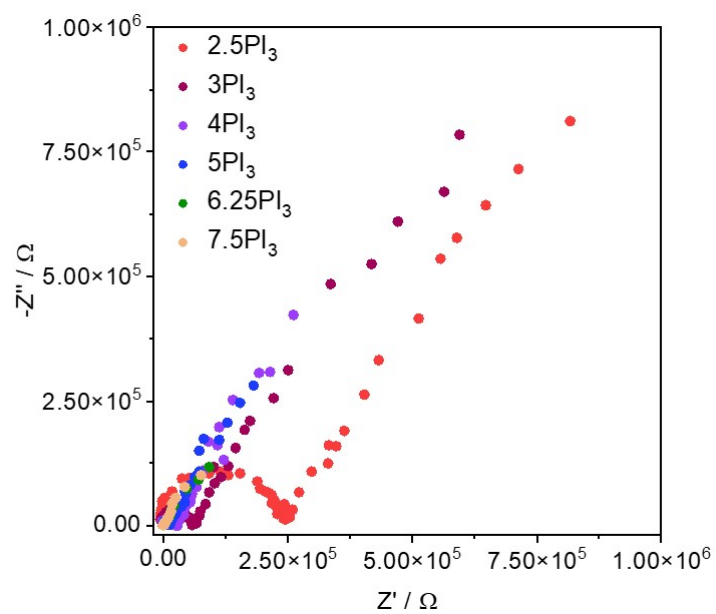

**Fig. S5** The Nyquist plots of  $(100-x)\text{Li}_2\text{S}-x\text{PI}_3$  ( $x=2.5, 3, 4, 5, 6.25, 7.5$ ).

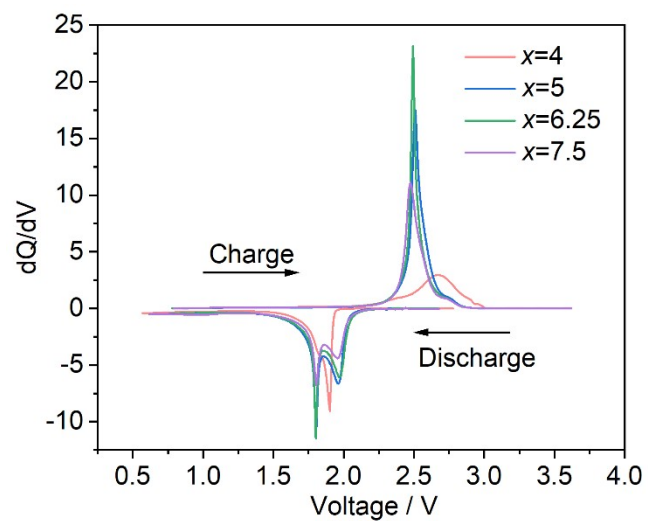

**Fig. S6** The differential capacity ( $dQ/dV$ ) plot of  $(1-x) \text{Li}_2\text{S}-x\text{PI}_3$  ( $x=4-7.5$ ).

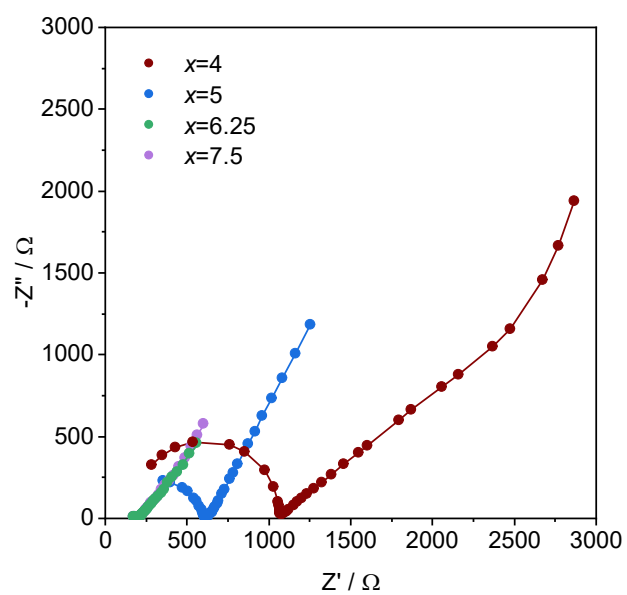

**Fig. S7** The EIS and the fitting results by equivalent circuit model for the batteries with  $(100-x)\text{Li}_2\text{S}-x\text{PI}_3\text{-C}$  ( $x=4, 5, 6.25$  and  $7.5$ ) as cathode at pristine state.



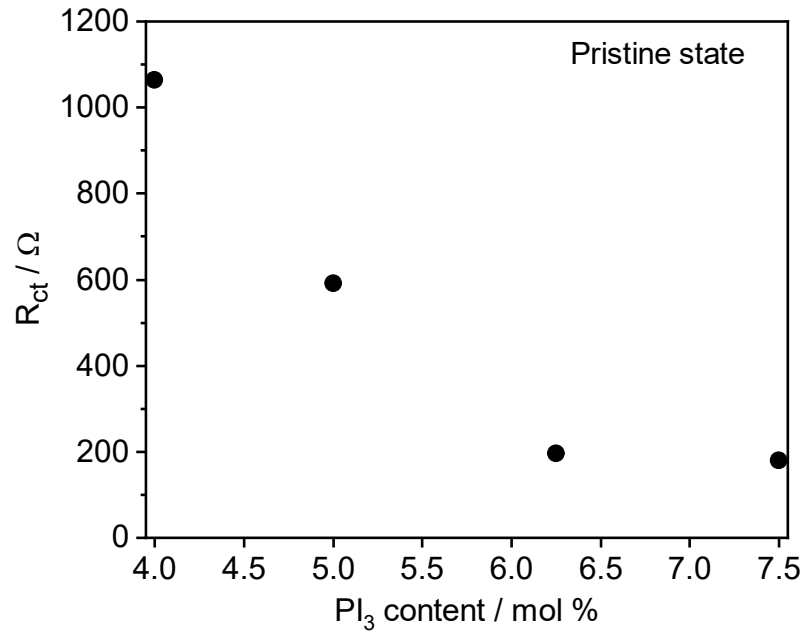

**Fig. S8** The  $R_{ct}$  obtained by equivalent circuit model for the batteries with  $(100-x)\text{Li}_2\text{S}-x\text{PI}_3\text{-C}$  ( $x=4, 5, 6.25$  and  $7.5$ ) as cathode at pristine state.

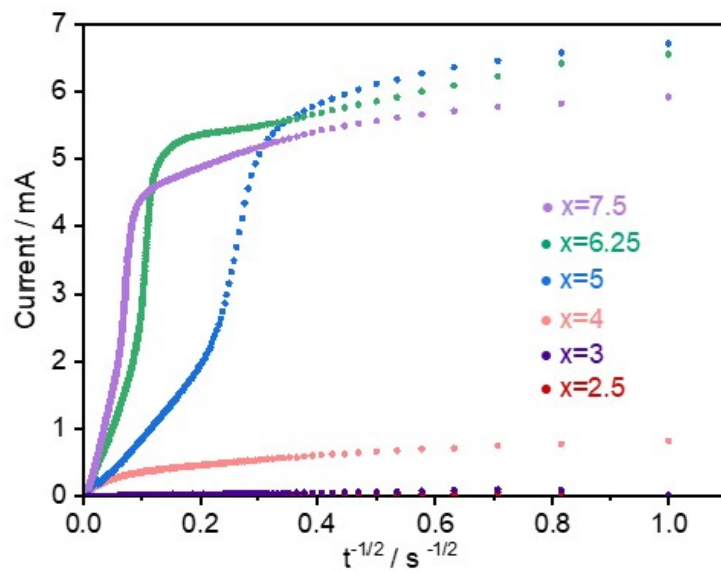

**Fig. S9** The Cottrell plots of  $(100-x)\text{Li}_2\text{S}-x\text{PI}_3\text{-C}$  ( $x=2.5, 3, 4, 5, 6.25, 7.5$ ).

**Table S1** The structure information obtained by Rietveld refinement of TOF neutron diffraction.

(a) The space group of  $\text{Li}_2\text{S}$  is  $Fm\bar{3}m$ . Standard deviations are shown in parentheses.

The final R factors and lattice parameters are  $R_p=5.20\%$   $wR_p=4.83\%$ ,  $RF_{obs}=8.96\%$  and  $RF_{wobs}=5.98\%$ .  $a=b=c=5.7130(3)$  Å.

| Atom | Site | $g$            | $x$ | $y$ | $z$ | $B$ (Å <sup>2</sup> ) |
|------|------|----------------|-----|-----|-----|-----------------------|
| Li/P | $8c$ | 0.998/0        | 1/4 | 1/4 | 1/4 | 1.50(10)              |
| S/I  | $4a$ | 0.998/0.002(1) | 0   | 0   | 0   | 1.26(8)               |

(b) The space group of  $97.5\text{Li}_2\text{S}-2.5\text{PI}_3$  is  $Fm\bar{3}m$ . Standard deviations are shown in

parentheses. The final R factors and lattice parameters are  $R_p=5.19\%$   $wR_p=4.56\%$ ,  $RF_{obs}=7.81\%$  and  $RF_{wobs}=5.62\%$ .  $a=b=c=5.7395(2)$  Å.

| Atom | Site | $g$            | $x$ | $y$ | $z$ | $B$ (Å <sup>2</sup> ) |
|------|------|----------------|-----|-----|-----|-----------------------|
| Li/P | $8c$ | 0.979/0.004    | 1/4 | 1/4 | 1/4 | 1.59(5)               |
| S/I  | $4a$ | 0.979/0.021(1) | 0   | 0   | 0   | 1.17(4)               |

(c) The space group of  $95\text{Li}_2\text{S}-5\text{PI}_3$  is  $Fm\bar{3}m$ . Standard deviations are shown in

parentheses. The final R factors and lattice parameters are  $R_p=2.67\%$   $wR_p=2.64\%$ ,  $RF_{obs}=4.06\%$  and  $RF_{wobs}=2.84\%$ .  $a=b=c=5.7605(7)$  Å.

| Atom | Site | $g$            | $x$ | $y$ | $z$ | $B$ (Å <sup>2</sup> ) |
|------|------|----------------|-----|-----|-----|-----------------------|
| Li/P | $8c$ | 0.962/0.006    | 1/4 | 1/4 | 1/4 | 1.58(2)               |
| S/I  | $4a$ | 0.962/0.038(1) | 0   | 0   | 0   | 0.98(5)               |

(d) The space group of  $93.75\text{Li}_2\text{S}-6.25\text{PI}_3$  is  $Fm\bar{3}m$ . Standard deviations are shown in

parentheses. The final R factors and lattice parameters are  $R_p=2.60\%$   $wR_p=2.60\%$ ,  $RF_{obs}=3.85\%$  and  $RF_{wobs}=2.99\%$ .  $a=b=c=5.7689(2)$  Å.

| Atom | Site | $g$            | $x$ | $y$ | $z$ | $B$ (Å <sup>2</sup> ) |
|------|------|----------------|-----|-----|-----|-----------------------|
| Li/P | $8c$ | 0.952/0.008    | 1/4 | 1/4 | 1/4 | 1.28(6)               |
| S/I  | $4a$ | 0.952/0.048(1) | 0   | 0   | 0   | 0.68(3)               |

(e) The space group of  $92.5\text{Li}_2\text{S}-7.5\text{PI}_3$  is  $Fm\bar{3}m$ . Standard deviations are shown in parentheses. The final R factors and lattice parameters are  $R_p=4.26\%$ ,  $wR_p=5.16\%$ ,  $RF_{obs}=5.46\%$  and  $RF_{wobs}=4.45\%$ .  $a=b=c=5.7723(2)$  Å.

| Atom | Site | $g$            | $x$ | $y$ | $z$ | $B$ (Å <sup>2</sup> ) |
|------|------|----------------|-----|-----|-----|-----------------------|
| Li/P | $8c$ | 0.947/0.009    | 1/4 | 1/4 | 1/4 | 1.21(6)               |
| S/I  | $4a$ | 0.947/0.053(1) | 0   | 0   | 0   | 1.12(7)               |

**Table S2.** The parameters of EIS fitting by equivalent circuit model for the batteries with  $(100-x)\text{Li}_2\text{S}-x\text{PI}_3\text{-C}$  ( $x=4, 5, 6.25$  and  $7.5$ ) as cathode at pristine state.

| PI <sub>3</sub> content | 4                     | 5                     | 6.25                  | 7.5                   |
|-------------------------|-----------------------|-----------------------|-----------------------|-----------------------|
| R <sub>1</sub> (Ω)      | 9.89                  | 10.02                 | 9.93                  | 10.04                 |
| CPE-T                   | $1.53 \times 10^{-9}$ | $2.52 \times 10^{-9}$ | $5.78 \times 10^{-9}$ | $6.18 \times 10^{-9}$ |
| CPE-P                   | 0.785                 | 0.857                 | 0.862                 | 0.804                 |
| R <sub>ct</sub> (Ω)     | 1063.3                | 590.2                 | 195.4                 | 180.1                 |
| W-R                     | 143.4                 | 120.5                 | 113.4                 | 111.5                 |
| W-T                     | 0.008                 | 0.016                 | 0.018                 | 0.019                 |
| W-P                     | 0.309                 | 0.288                 | 0.342                 | 0.345                 |
| C (μF)                  | 1.050                 | 14.36                 | 40.34                 | 42.52                 |
